# Supplementary material
Source: ML conference proceedings conference paper supplement (https://proceedings.mlr.press/v70/taieb17a.html)
Supplement: Supplementary file [file taieb17a-supp.pdf]

# Coherent probabilistic forecasts for hierarchical time series

Appendix

24 February 2017

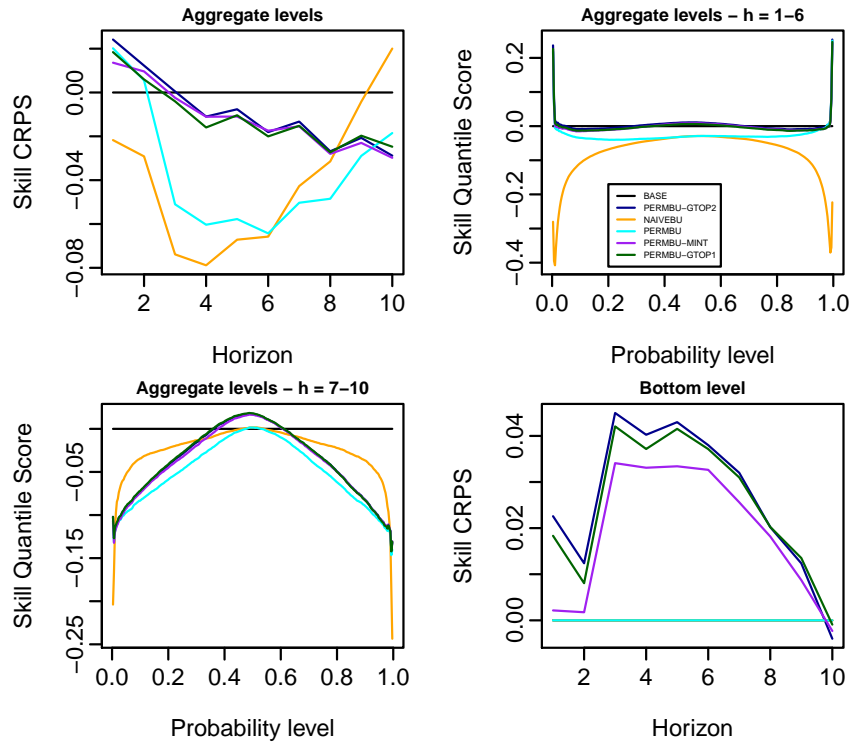

Figure 1: Skill CRPS and skill QS for aggregate and bottom levels for  $T = 300$ .

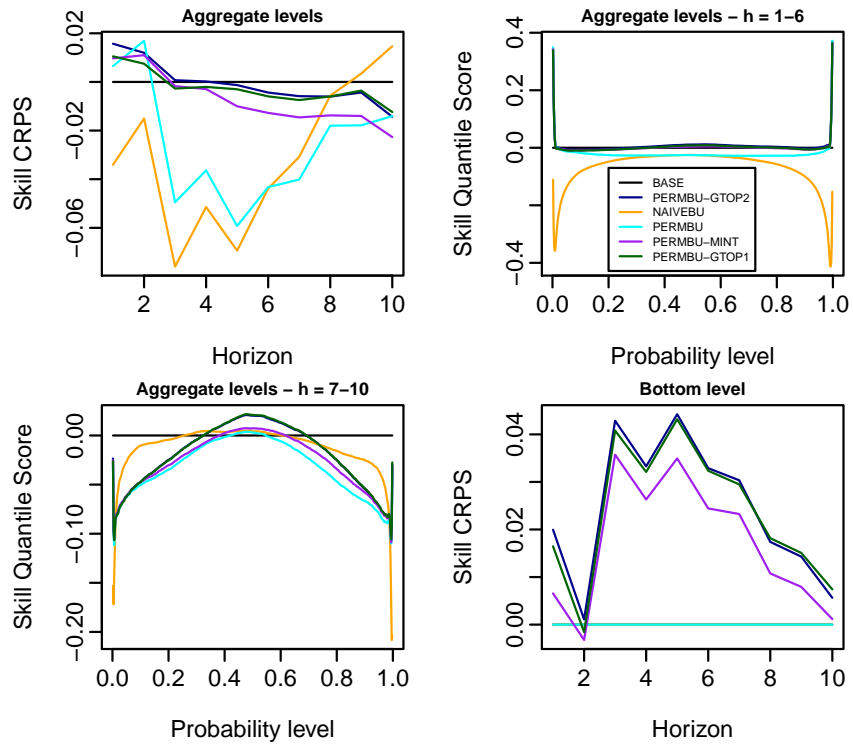

Figure 2: Skill CRPS and skill QS for aggregate and bottom levels for  $T = 500$ .

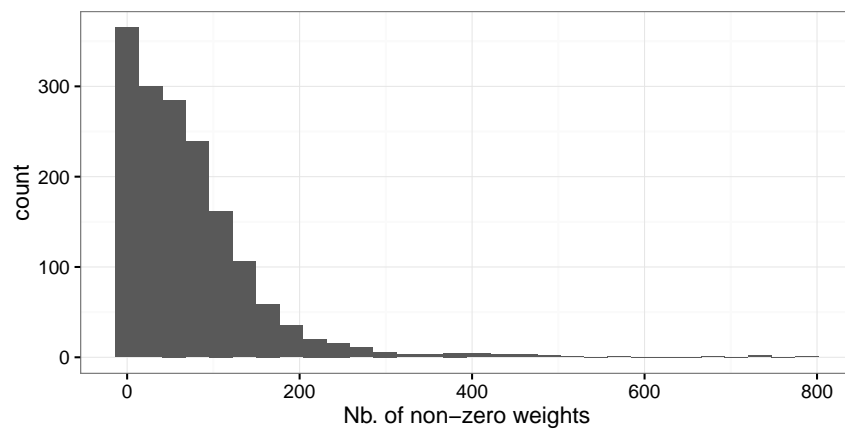

Figure 3: Histogram of the number of non-zero combination weights for 1633 series.
